# Supplementary material for: The Status of Molecular Analyses of Isolates of Acanthamoeba Maintained by International Culture Collections
Source: MDPI journal article supplement (doi:10.3390/microorganisms11020295), 2023-01-23
Supplement: s1 [file s1]

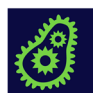

**Supplementary Table S9.** References for sources of DNA sequence information for cultures of *Acanthamoeba* from ATCC, CCAP or BEI.

The table includes information on sequence accession number from GenBank and associated source references for isolates listed in Appendices Tables A1–A8.

**1. References for DNA sequence sources of cultures that are currently available from ATCC, with equivalent CCAP or BEI identifiers**

|                           |                       |
|---------------------------|-----------------------|
| ATCC 30010 (CCAP 1501/1A) | [39,45,83–85,87–91]   |
| ATCC 30011 (CCAP 1501/10) | [89,93]               |
| ATCC 30134                | [27,94]               |
| ATCC 30135 (CCAP 1501/5)  | [26,27,41]            |
| ATCC 30137 (CCAP 1534/1)  | [26,27,41,95]         |
| ATCC 30171                | [26,95,96]            |
| ATCC 30173                | [57]                  |
| ATCC 30234                | [41,47,97]            |
| ATCC 30461                | [98,99,100]           |
| ATCC 30487                | [26,103]              |
| ATCC 30730                | [26]                  |
| ATCC 30731 (CCAP 1501/4)  | [27,28,41]            |
| ATCC 30732                | [59,101]              |
| ATCC 30841                | [27,95,102]           |
| ATCC 30866                | [26,27]               |
| ATCC 30867                | [26,27]               |
| ATCC 30868 (CCAP 1501/2G) | [103,105]             |
| ATCC 30869 (CCAP 1534/3)  | [89]                  |
| ATCC 30870 (CCAP 1547/1)  | [27,41,89,95,103,105] |
| ATCC 30871 (CCAP 1501/3A) | [26,41,103]           |
| ATCC 30872 (CCAP 1501/3B) | [98]                  |
| ATCC 30873 (CCAP 1501/3D) | [8,26,27]             |
| ATCC 30884 (CCAP 1501/7)  | [27,28,41]            |
| ATCC 30901 (CCAP 1501/9)  | [98,105]              |
| ATCC 30921                | [27]                  |
| ATCC 30973                | [95,99,106]           |
| ATCC 50238                | [70,106]              |
| ATCC 50239                | [70]                  |
| ATCC 50240                | [95,107]              |
| ATCC 50241                | [70,95]               |
| ATCC 50243                | [34]                  |
| ATCC 50251                | [106]                 |
| ATCC 50252                | [8,26]                |
| ATCC 50253                | [95,106,108]          |
| ATCC 50254                | [17,40,89,95,106]     |
| ATCC 50368                | [27,28]               |
| ATCC 50369                | [27,28]               |
| ATCC 50370                | [8,27,28,37,95]       |
| ATCC 50371                | [27,28]               |
| ATCC 50372                | [27,28,37,95]         |
| ATCC 50373 (CCAP 1501/1B) | [27,28,37]            |
| ATCC 50374                | [27,28]               |
| ATCC 50388                | [26]                  |
| ATCC 50427                | [103]                 |
| ATCC 50428                | [103]                 |

---

|                                       |                |
|---------------------------------------|----------------|
| ATCC 50429                            | [103]          |
| ATCC 50435                            | [26]           |
| ATCC 50436                            | [38]           |
| ATCC 50491                            | [27,28]        |
| ATCC 50492                            | [27,28,111]    |
| ATCC 50493                            | [27,28,112]    |
| ATCC 50494                            | [27,28]        |
| ATCC 50495 (NR-46462)                 | [27,28]        |
| ATCC 50496                            | [27,28,95,113] |
| ATCC 50497                            | [27,28]        |
| ATCC 50498                            | [27,28]        |
| ATCC 50662                            | [38]           |
| ATCC 50664                            | [38]           |
| ATCC 50665                            | [38]           |
| ATCC 50669                            | [38]           |
| ATCC 50670                            | [38]           |
| ATCC 50675                            | [38]           |
| ATCC 50676                            | [27,40]        |
| ATCC 50677                            | [27,40]        |
| ATCC 50678                            | [27,40]        |
| ATCC 50679                            | [27,40]        |
| ATCC 50680                            | [27,40]        |
| ATCC 50681                            | [27,40]        |
| ATCC 50682                            | [27,40]        |
| ATCC 50683                            | [27,40]        |
| ATCC 50684                            | [27,40]        |
| ATCC 50685                            | [27,40]        |
| ATCC 50686                            | [27,40]        |
| ATCC 50687                            | [27,40]        |
| ATCC 50690                            | [103]          |
| ATCC 50691                            | [103]          |
| ATCC 50692                            | [103]          |
| ATCC 50702                            | [114]          |
| ATCC 50703                            | [97,103]       |
| ATCC 50704 (NR-10462)                 | [103,115]      |
| ATCC 50705                            | [103]          |
| ATCC 50706                            | [97,103]       |
| ATCC 50707                            | [97,103]       |
| ATCC 50708 ( <u>NOT</u> CCAP 1501/3c) | [26]           |
| ATCC 50709                            | [26,27]        |
| ATCC 50710                            | [26]           |
| ATCC 50711                            | [26]           |
| ATCC 50722                            | [112]          |
| ATCC 50727                            | [26]           |
| ATCC 50739                            | [4,97]         |
| ATCC PRA-1                            | [116]          |
| ATCC PRA-2                            | [38]           |
| ATCC PRA-3                            | [57]           |
| ATCC PRA-4                            | [116]          |
| ATCC PRA-7                            | [116]          |
| ATCC PRA-8                            | [116]          |
| ATCC PRA-9                            | [57]           |
| ATCC PRA-10                           | [116]          |
| ATCC PRA-11                           | [116]          |

|                         |           |
|-------------------------|-----------|
| ATCC PRA-12             | [38]      |
| ATCC PRA-75 (NR-33654)  | [70]      |
| ATCC PRA-76 (NR-33655)  | [70]      |
| ATCC PRA-77 (NR-33656)  | [70]      |
| ATCC PRA-78 (NR-33657)  | [70]      |
| ATCC PRA-79 (NR-33658)  | [70]      |
| ATCC PRA-80 (NR-33659)  | [70]      |
| ATCC PRA-81 (NR-33660)  | [70]      |
| ATCC PRA-82 (NR-33661)  | [70]      |
| ATCC PRA-83 (NR-33662)  | [70]      |
| ATCC PRA-84 (NR-33663)  | [70]      |
| ATCC PRA-105            | [117]     |
| ATCC PRA-106            | [118]     |
| ATCC PRA-107            | [117]     |
| ATCC PRA-108            | [119]     |
| ATCC PRA-112 (NR-10461) | [119]     |
| ATCC PRA-113            | [117]     |
| ATCC PRA-114            | [117]     |
| ATCC PRA-115            | [119]     |
| ATCC PRA-219            | [116]     |
| ATCC PRA-220            | [120]     |
| ATCC PRA-221            | [72]      |
| ATCC PRA-222            | [72]      |
| ATCC PRA-223            | [72]      |
| ATCC PRA-225            | [72]      |
| ATCC PRA-226            | [72]      |
| ATCC PRA-227            | [72]      |
| ATCC PRA-228            | [72]      |
| ATCC PRA-287            | [115,122] |
| ATCC PRA-411 (NR-46481) | [54]      |

## 2. References for DNA sequence sources of cultures that are currently available from CCAP and that are not equivalent to any ATCC culture

|                               |            |
|-------------------------------|------------|
| CCAP 1501/3c (NOT ATCC 50708) | [26,27,41] |
| CCAP 1501/8                   | [89]       |
| CCAP 1501/14                  | [89]       |
| CCAP 1501/17                  | [89]       |
| CCAP 1501/18                  | [123,73]   |
| CCAP 1501/19                  | [56]       |
| CCAP 1534/2                   | [89]       |

## 3. References for DNA sequence sources of cultures that are currently available from BEI and that are not equivalent to any ATCC culture

|                     |       |
|---------------------|-------|
| NR-46463 (CDC:V036) | [112] |
| NR-46466 (CDC:V313) | [70]  |
| NR-46467 (CDC:V329) | [70]  |
| NR-46468 (CDC:V333) | [112] |
| NR-46470 (CDC:V411) | [70]  |
| NR-46473 (CDC:V522) | [70]  |
| NR-46476 (CDC:V548) | [125] |

## 4. References for DNA sequence sources of cultures that are currently available from BEI but that are equivalent to inactive ATCC cultures

---

|                       |      |
|-----------------------|------|
| NR-46460 (ATCC 50656) | [70] |
| NR-46461 (ATCC 50657) | [70] |

**5. References for DNA sequence sources of inactive cultures or cultures no longer available from culture centers**

|              |             |
|--------------|-------------|
| ATCC 50659   | [70]        |
| ATCC 50723   | [26]        |
| ATCC 50724   | [26,27,109] |
| ATCC 50725   | [26]        |
| ATCC 50726   | [126]       |
| ATCC PRA-224 | [121]       |
